# Supplementary material for: Manganese-52: applications in cell radiolabelling and liposomal nanomedicine PET imaging using oxine (8-hydroxyquinoline) as an ionophore
Source: Royal Society of Chemistry journal article supplement (doi:10.1039/c8dt00100f), 2018-01-01
Supplement: c8dt00100f1.pdf [file c8dt00100f1.pdf]

## Electronic Supplementary Information (ESI)

### **Manganese-52: applications in cell radiolabelling and liposomal nanomedicine PET imaging using oxine (8-hydroxyquinoline) as an ionophore.**

Peter Gawne,<sup>a</sup> Francis Man,<sup>a</sup> Jesper Fonslet,<sup>b</sup> Riya Radia,<sup>a</sup> Jayanta Bordoloi,<sup>a</sup> Matthew Cleveland,<sup>c</sup> Pilar Jimenez-Royo,<sup>c</sup> Alberto Gabizon,<sup>d</sup> Philip J. Blower,<sup>a</sup> Nicholas Long<sup>e</sup> and Rafael T. M. de Rosales<sup>\*a</sup>

<sup>a</sup> School of Biomedical Engineering & Imaging Sciences, King's College London, St. Thomas' Hospital, London, SE1 7EH, U.K.

<sup>b</sup> The Hevesy Lab, Technical University of Denmark, 4000 Roskilde, Denmark.

<sup>c</sup> GSK Medicines Research Centre, Gunnels Wood Road, Stevenage, Hertfordshire, SG1 2NY, U.K.

<sup>d</sup> Oncology Institute, Shaare Zedek Medical Center and Hebrew University–School of Medicine, Jerusalem 9103102, Israel.

<sup>e</sup> Department of Chemistry, Imperial College London, South Kensington Campus, London SW7 2AZ, U.K.

E-mail: [rafael.torres@kcl.ac.uk](mailto:rafael.torres@kcl.ac.uk)

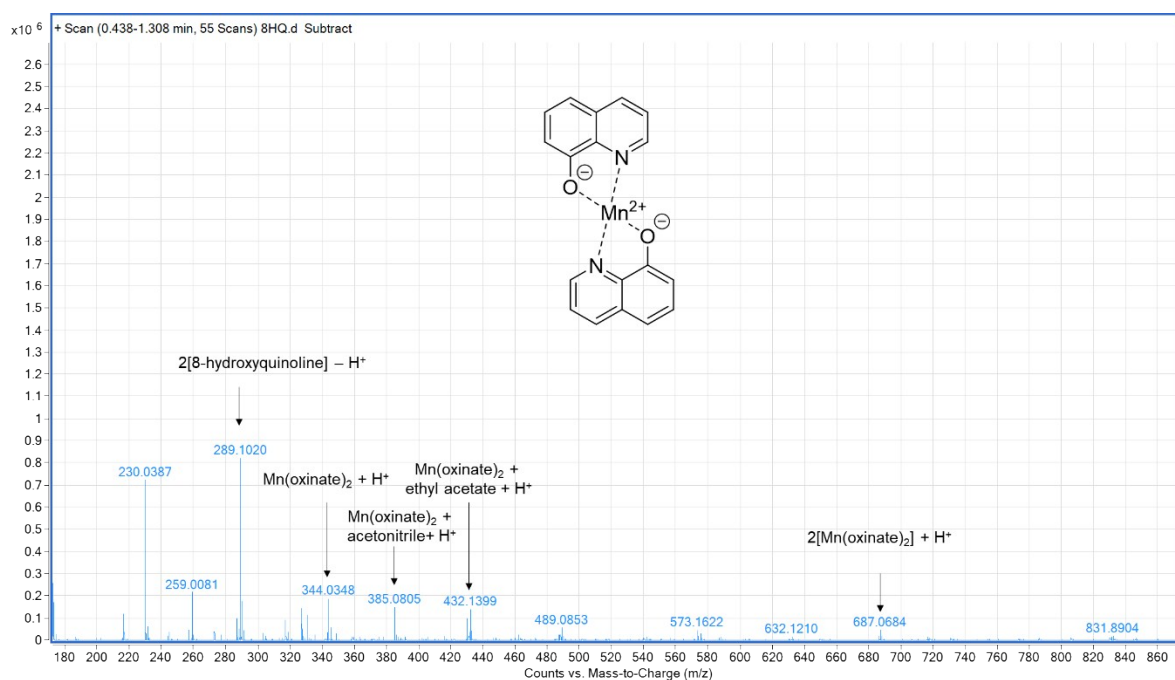

**Figure S1:** Mass spectrum (ESI, +ve mode) of  $\text{Mn(oxinate)}_2$ . Mass peak at 343.0348 corresponds to the bis-oxine manganese(II) complex  $[\text{M} + \text{H}]^+$ .

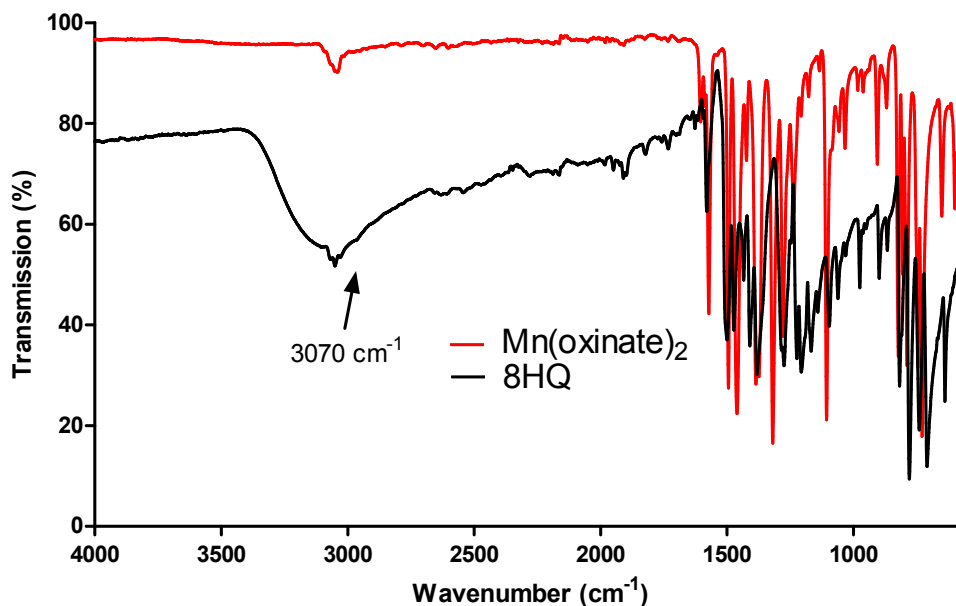

**Figure S2:** Infra-red spectrum of 8-hydroxyquinoline (black line) and  $\text{Mn(oxinate)}_2$  (red line). After reaction with  $\text{MnCl}_2$ , a reduction of the broad O-H stretch band at 2700-3400  $\text{cm}^{-1}$  occurs - relating to the formation of the Mn-O bond.

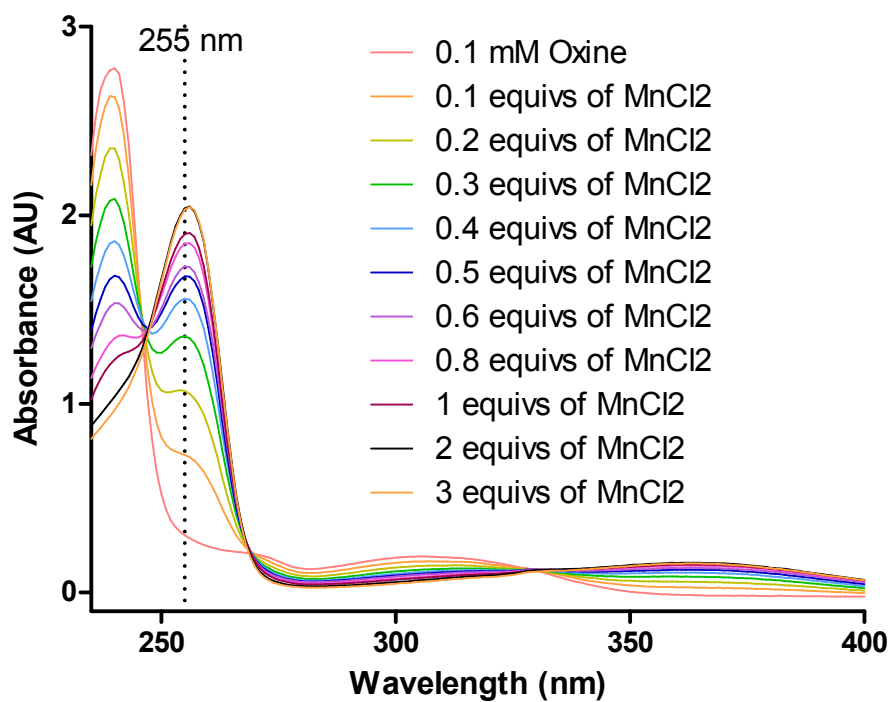

**Figure S3:** Representative UV-vis titration of  $\text{MnCl}_2$  into a 0.1 mM solution of oxine at pH 9.

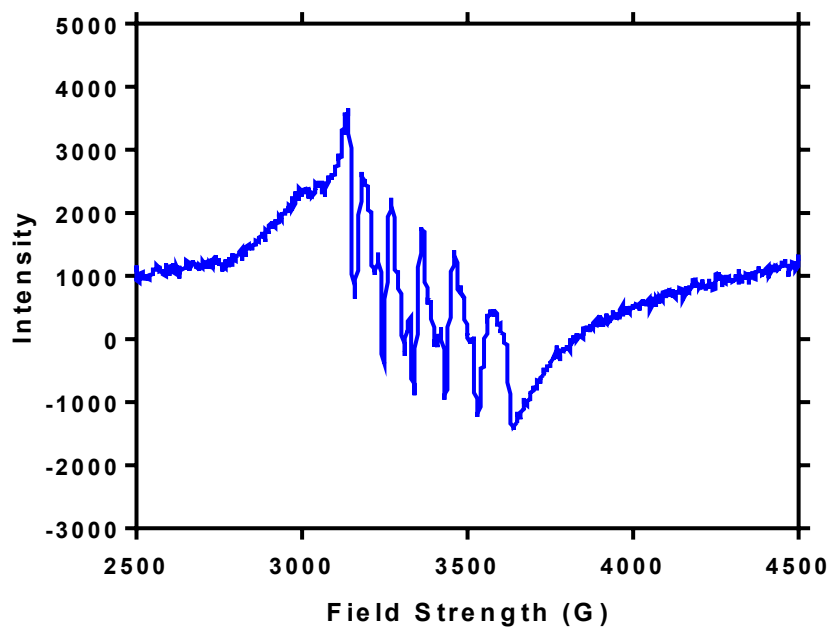

**Figure S4:** EPR spectrum of a 1 mM oxine solution (in 1 mM ammonium acetate buffer, pH 9) after addition of 0.5 equivalents of  $\text{MnCl}_2$  at 100 K. Formation of a  $\text{Mn}^{2+}$  species is clearly evident.

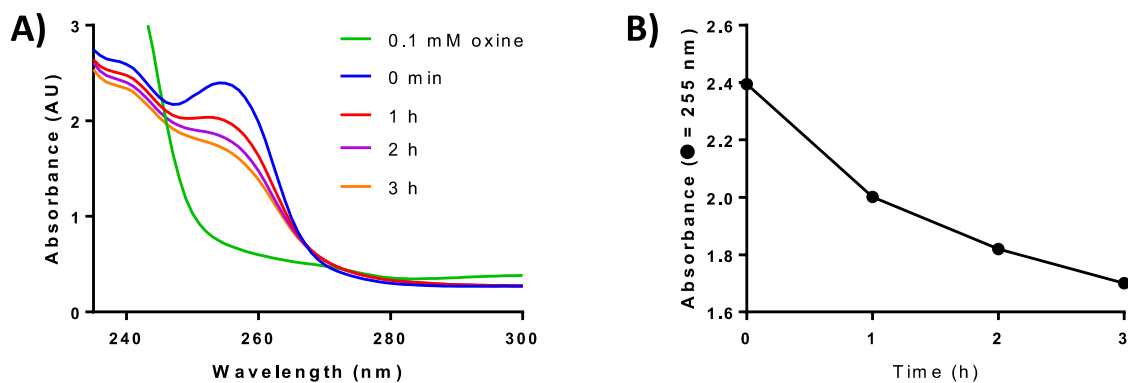

**Figure S5:** **A)** Overlaid UV-vis spectra of a 0.1 mM oxine solution (in 1 mM ammonium acetate buffer, pH 9, green line) and at different time points after addition of 0.5 equivalents of MnCl<sub>2</sub>; **B)** plot of absorbance at  $\lambda = 255$  nm versus hours after addition of MnCl<sub>2</sub>.

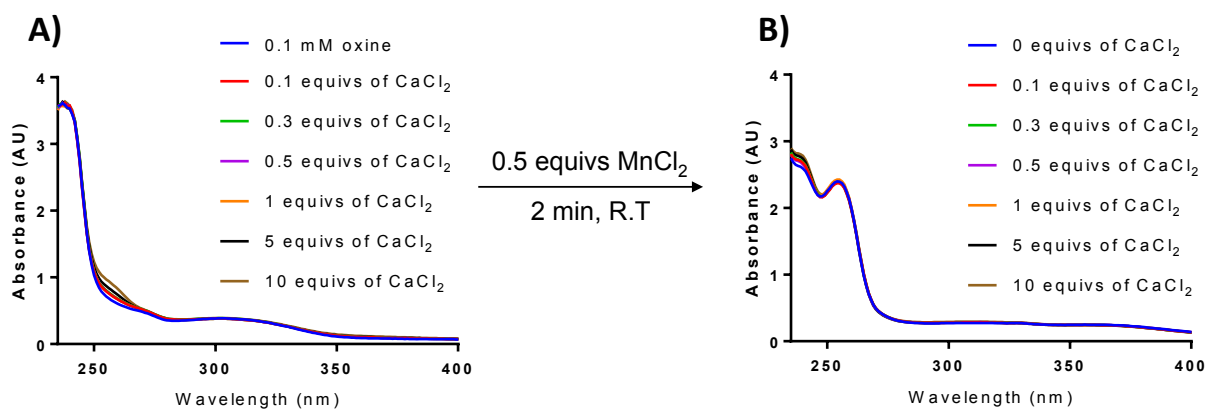

**Figure S6:** **A)** Overlaid UV-vis spectra of a 0.1 mM oxine solution in 1 mM ammonium acetate buffer (pH 9) in the absence and presence of various equivalents of CaCl<sub>2</sub>; **B)** Overlaid UV-vis spectra after addition of 0.5 equivalents of MnCl<sub>2</sub> to each of these solutions. The presence of calcium chloride appeared to have no inhibitory effect on the Mn(oxinate)<sub>2</sub> complex being formed *in situ*.

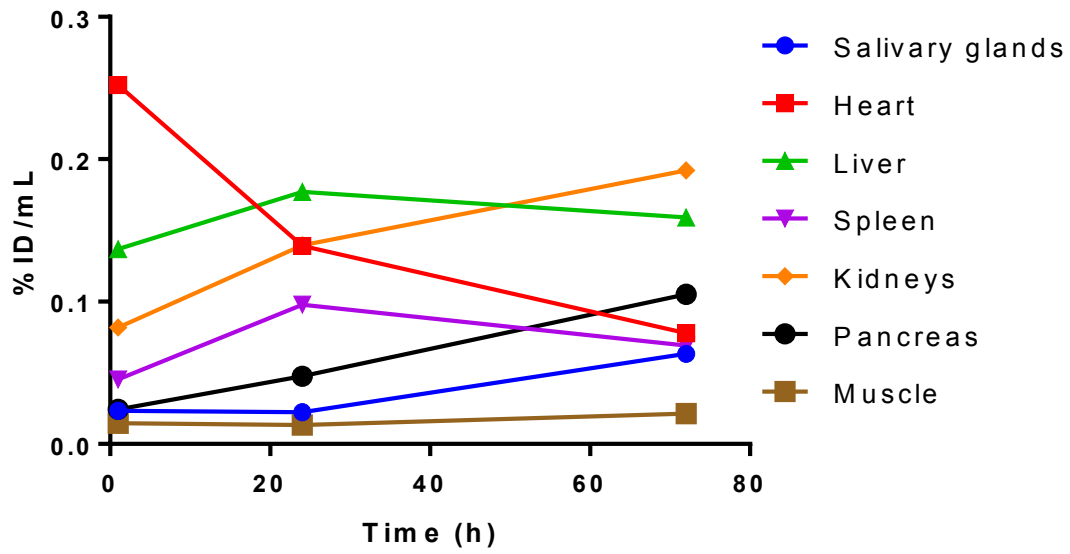

**Figure S7:** Time-activity curve based on the imaging study shown in Figure 6 (n = 1). A gradual clear increase in activity in the pancreas, salivary glands and kidneys is consistent with the release of  $^{52}\text{Mn}$  from the  $^{52}\text{Mn}$ Mn-DOXIL complex.
